# Supplementary material for: Two-Year Follow-Up of Vascular Events in Peripheral Arterial Disease Treated With Antiplatelet Agents: A Prospective Observational Multicenter Cohort Study (SEASON)
Source: PubMed Central journal article supplement (PMC5522420; doi:10.1038/s41598-017-06597-y), 2017-07-21
Supplement: 41598_2017_6597_MOESM1_ESM.pdf [file 41598_2017_6597_MOESM1_ESM.pdf]

## Supplementary Data

### **Two-Year Follow-Up of Vascular Events in Peripheral Arterial Disease Treated With Antiplatelet Agents: A Prospective Observational Multicenter Cohort Study (SEASON)**

Yukihito Higashi, MD<sup>1</sup>; Tetsuro Miyata, MD<sup>2</sup>; Hiroshi Shigematsu, MD<sup>2</sup>; Hideki Origasa, PhD<sup>3</sup>; Masatoshi Fujita, MD<sup>4</sup>; Hiroshi Matsuo, MD<sup>5</sup>; Hiroaki Naritomi, MD<sup>6</sup>; Hiroaki Matsuda, MPH<sup>7</sup>; Masahide Nakajima, PhD<sup>7</sup>; and Hideto Awano, MS<sup>7</sup>, for the SEASON Investigators

**1** Department of Cardiovascular Regeneration and Medicine, Research Institute for Radiation Biology and Medicine, Hiroshima University, Hiroshima, Japan

**2** Sanno Medical Center, International University of Health and Welfare, Tokyo, Japan

**3** Division of Biostatistics and Clinical Epidemiology, University of Toyama School of Medicine, Toyama, Japan

**4** Department of Cardiovascular Medicine, Uji Hospital, Uji, Kyoto, Japan

**5** Matsuo Clinic, Osaka, Japan

**6** Senri Chuo Hospital, Osaka, Japan

**7** Mitsubishi Tanabe Pharma Corporation, Osaka, Japan

Yukihito Higashi (yhigashi@hiroshima-u.ac.jp)

Tetsuro Miyata (tmiyata-tky@umin.ac.jp)

Hiroshi Shigematsu (h-shigematsu@iuhw.ac.jp)

Hideki Origasa (horigasa@las.u-toyama.ac.jp)

Masatoshi Fujita (mfujita@kuhp.kyoto-u.ac.jp)

Hiroshi Matsuo (hiro-matu@fan.hi-ho.ne.jp)

Hiroaki Naritomi (naritomi@kyowakai.com)

Hiroaki Matsuda (Matsuda.Hiroaki@mk.mt-pharma.co.jp)

Masahide Nakajima (Nakajima.Masahide@mh.mt-pharma.co.jp)

Hideto Awano (Awano.Hideto@ma.mt-pharma.co.jp)

#### **Corresponding author:**

Yukihito Higashi, MD, Department of Cardiovascular Regeneration and Medicine, Research Institute for Radiation Biology and Medicine, Hiroshima University, 1-2-3 Kasumi, Minami-ku, Hiroshima, Japan (yhigashi@hiroshima-u.ac.jp)

**Supplementary Table 1.** Number of Recorded Events for Individual Cardiovascular, Cerebrovascular, and Peripheral Vascular Endpoints (RWP)

|                                       | Reported Events <sup>a</sup> | SEASON Events <sup>b</sup> |                             |
|---------------------------------------|------------------------------|----------------------------|-----------------------------|
|                                       |                              | No. of Events              | No. of Patients With Events |
| <b>Cerebrovascular Event</b>          |                              |                            |                             |
| Cerebral infarction                   | 152                          | 133                        | 128                         |
| Intracerebral hemorrhage              | 28                           | 24                         | 24                          |
| Subarachnoid hemorrhage               | 10                           | 9                          | 9                           |
| Transient ischemic attack             | 27                           | 16                         | 16                          |
| <b>Cardiovascular Event</b>           |                              |                            |                             |
| Myocardial infarction                 | 64                           | 49                         | 48                          |
| Unstable angina                       | 79                           | 49                         | 48                          |
| Heart failure                         | 181                          | 125                        | 117                         |
| <b>Peripheral vascular event</b>      |                              |                            |                             |
| Amputation                            | 96                           | 75                         | 70                          |
| Development of critical limb ischemia | 178                          | 39                         | 38                          |
| Acute limb ischemia                   | 72                           | 55                         | 54                          |
| New onset of end-stage renal failure  | 22                           | 18                         | 17                          |
| Acute aortic dissection               | 5                            | 4                          | 4                           |
| Rupture of abdominal aortic aneurysm  | 5                            | 5                          | 5                           |
| Acute pulmonary thromboembolism       | 2                            | 1                          | 1                           |

Abbreviations: RWP, real-world population.

<sup>a</sup> All events reported by the investigators.

<sup>b</sup> All events assessed by the Efficacy Endpoint Review Committee and judged as vascular events.
